# Supplementary material for: Developing Fermentation Liquid of Bacillus amyloliquefaciens PMB04 to Control Bacterial Leaf Spot of Sweet Pepper
Source: MDPI journal article supplement (doi:10.3390/agriculture13071456), 2023-07-23
Supplement: s1 [file s1]

Table S1. BLAST results of *Xanthomonas* sp. strains on 16SrDNA sequence.

| Strain | Bacterial strains in GenBank         | Identity (%) | Accession  |
|--------|--------------------------------------|--------------|------------|
| XL1    | <i>Xanthomonas perforans</i> 91-118  | 99.93        | CP019725.1 |
|        | <i>Xanthomonas perforans</i> LH3     | 99.93        | CP018475.1 |
|        | <i>Xanthomonas perforans</i> GEV1001 | 99.93        | CP116309.1 |
|        | <i>Xanthomonas perforans</i> GEV872  | 99.93        | CP116305.1 |
|        | <i>Xanthomonas perforans</i> TC2-1   | 99.93        | CP077785.1 |
| XL2    | <i>Xanthomonas perforans</i> 91-118  | 99.93        | CP019725.1 |
|        | <i>Xanthomonas perforans</i> LH3     | 99.93        | CP018475.1 |
|        | <i>Xanthomonas perforans</i> GEV1001 | 99.93        | CP116309.1 |
|        | <i>Xanthomonas perforans</i> GEV872  | 99.93        | CP116305.1 |
|        | <i>Xanthomonas perforans</i> TC2-1   | 99.93        | CP077785.1 |
| XL3    | <i>Xanthomonas perforans</i> 91-118  | 99.87        | CP019725.1 |
|        | <i>Xanthomonas perforans</i> LH3     | 99.87        | CP018475.1 |
|        | <i>Xanthomonas perforans</i> GEV1001 | 99.87        | CP116309.1 |
|        | <i>Xanthomonas perforans</i> GEV872  | 99.87        | CP116305.1 |
|        | <i>Xanthomonas perforans</i> TC2-1   | 99.87        | CP077785.1 |
| XL4    | <i>Xanthomonas perforans</i> 91-118  | 99.16        | CP019725.1 |
|        | <i>Xanthomonas perforans</i> LH3     | 99.16        | CP018475.1 |
|        | <i>Xanthomonas perforans</i> GEV1001 | 99.16        | CP116309.1 |
|        | <i>Xanthomonas perforans</i> GEV872  | 99.16        | CP116305.1 |
|        | <i>Xanthomonas perforans</i> TC2-1   | 99.16        | CP077785.1 |
| G1     | <i>Xanthomonas perforans</i> 91-118  | 99.87        | CP019725.1 |
|        | <i>Xanthomonas perforans</i> LH3     | 99.87        | CP018475.1 |
|        | <i>Xanthomonas perforans</i> GEV1001 | 99.87        | CP116309.1 |
|        | <i>Xanthomonas perforans</i> GEV872  | 99.87        | CP116305.1 |
|        | <i>Xanthomonas perforans</i> TC2-1   | 99.87        | CP077785.1 |
